# Supplementary material for: Hydrogencyanamido bridged multinuclear copper(ii) complexes: from strong antiferromagnetic couplings to weak ferromagnetic couplings
Source: Royal Society of Chemistry journal article supplement (doi:10.1039/c0dt01472a), 2011-01-01
Supplement: c0dt01472a.pdf [file c0dt01472a.pdf]

Electronic Supplementary Information

## Hydrogencyanamido Bridged Multinuclear Copper(II) Complexes: From Strong Antiferromagnetic Couplings to Weak Ferromagnetic Couplings

Ling-Chen Kang, Xin Chen, Xi-Sen Wang, Yi-Zhi Li, You Song\*, Jing-Lin Zuo\* and  
Xiao-Zeng You

State Key Laboratory of Coordination Chemistry, School of Chemistry and Chemical  
Engineering, Nanjing National Laboratory of Microstructures, Nanjing University,  
Nanjing 210093, P. R. China.

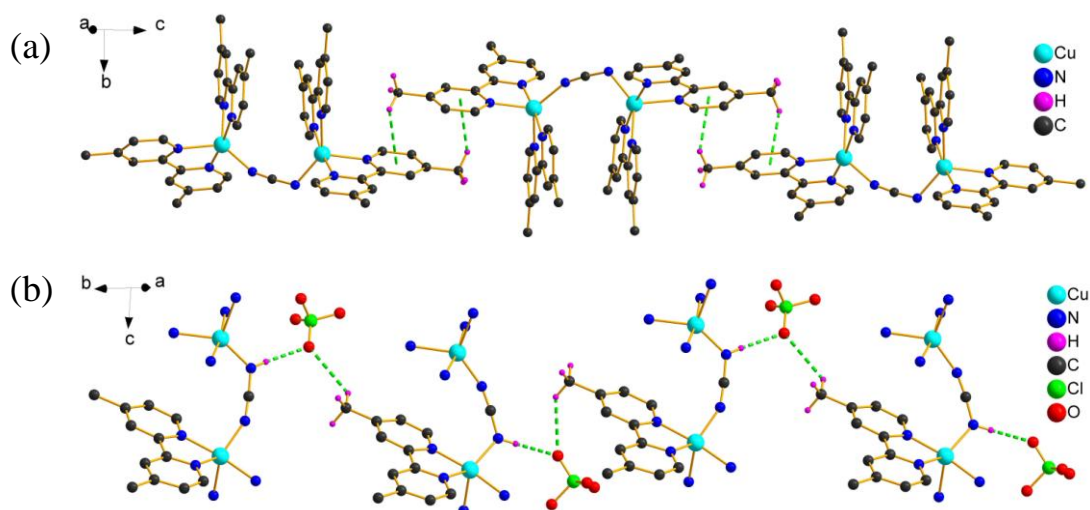

**Fig. S1** 1D chain structures formed by C–H··· $\pi$  interactions (a) and hydrogen bonds (b) (green dash lines) in complex 1.

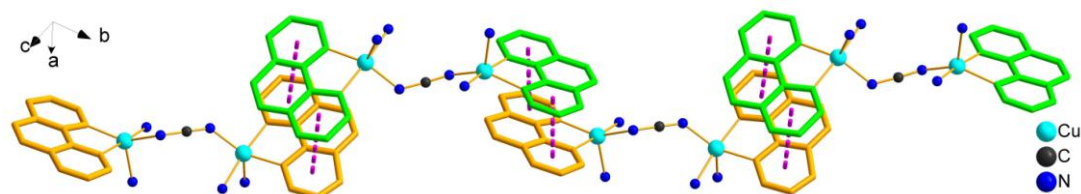

**Fig. S2** 1D chain structures formed by  $\pi$ ··· $\pi$  interactions (purple dash lines) in complex 2.

\* To whom correspondence should be addressed. Email: zuojl@nju.edu.cn; yousong@nju.edu.cn. Fax: +86-25-83314502. Nanjing University.

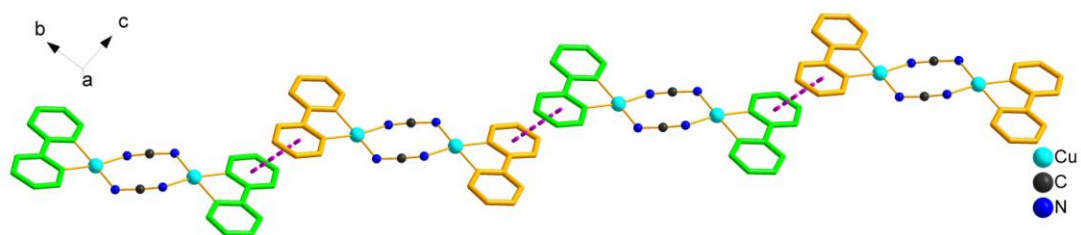

**Fig. S3** 1D chain structures formed by  $\pi \cdots \pi$  interactions (purple dash lines) in complex 3.

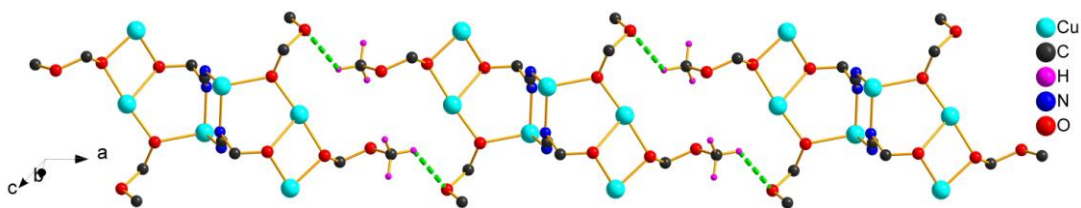

**Fig. S4** 1D chain structures formed by hydrogen bonds (green dash lines) in complex 4.

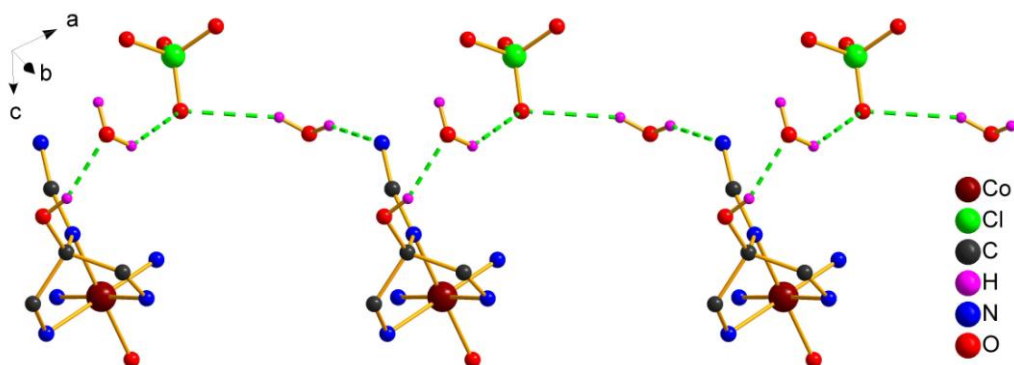

**Fig. S5** 1D chain structures formed by hydrogen bonds (green dash lines) in complex 5.

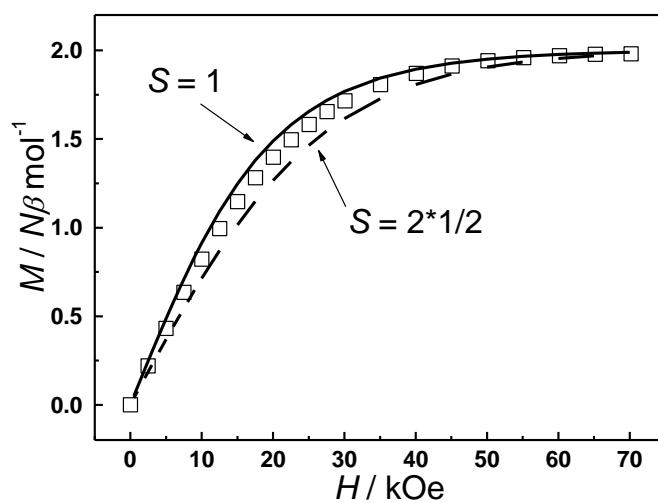

**Fig. S6** Field dependence of magnetization of **2** at 1.8 K. The lines represent the Brillouin function that corresponds to  $S = 1$  state (solid) and noninteracting  $S = 2S_{\text{Cu}}^{\text{II}}$  (break) and with  $g = 2.0$ .

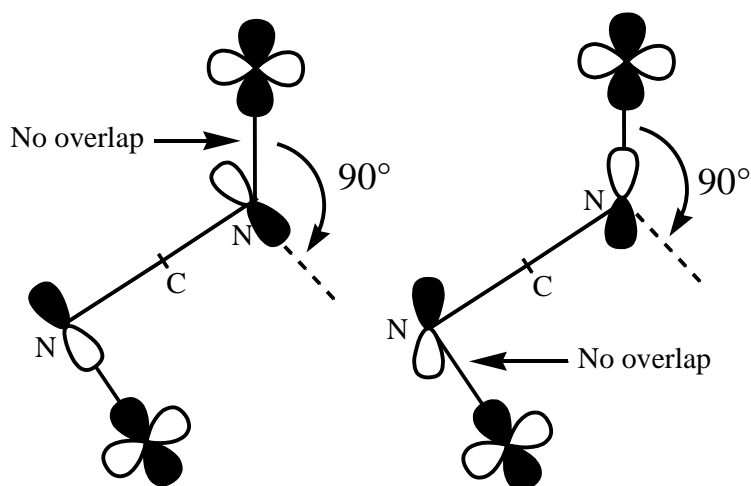

**Scheme S1** Accidental orthogonality of SOMOs with  $\varphi = 90^\circ$

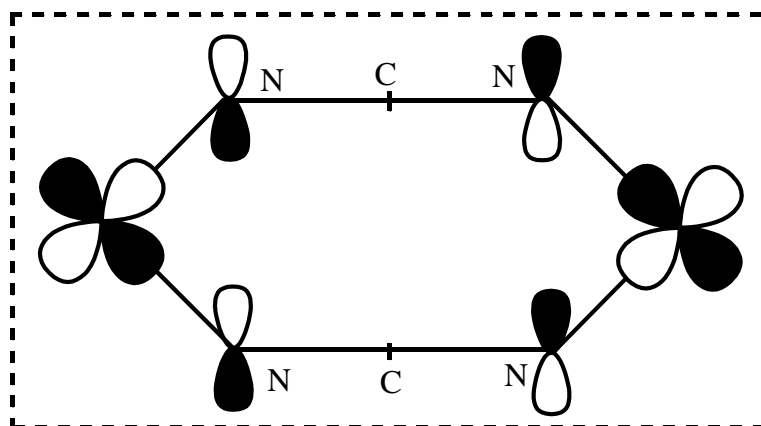

**Scheme S2** Excellent orbital overlap with perfect coplanarity of SOMOs.
